# Supplementary material
Source: MDPI journal article supplement (https://www.mdpi.com/2673-6918/1/3/10)
Supplement: s1 [file s1]

## Article

# GC-MS Analysis and In Silico Approaches of *Indigofera heterantha* Root Oil Chemical Constituents

Muhammad Aurang Zeb <sup>1,2,\*</sup>, Taj Ur Rahman <sup>3,\*</sup>, Muhammad Sajid <sup>2</sup>, Weilie Xiao <sup>1,\*</sup>, Syed Ghulam Musharraf <sup>4</sup>, Shabana Bibi <sup>5</sup>, Takashiro Akitsu <sup>6</sup> and Wajiha Liaqat <sup>3</sup>

<sup>1</sup> Key Laboratory of Medicinal Chemistry for Natural Resource, Ministry of Education and Yunnan Province, School of Chemical Science and Technology, Yunnan University, Kunming 650091, China

<sup>2</sup> Department of Biochemistry, Hazara University, Mansehra 21120, Pakistan; sajid931@hotmail.com

<sup>3</sup> Department of Chemistry, Mohi-Ud-Din Islamic University, AJ&K 12080, Pakistan; gia\_248@yahoo.com

<sup>4</sup> H.E.J. Research Institute of Chemistry, ICCBS, University of Karachi, Karachi 75270, Pakistan; musharraf1977@yahoo.com

<sup>5</sup> Yunnan Herbal Laboratory, School of Ecology and Environmental Sciences, Yunnan University, Kunming 650091, China; dazzling.grin@gmail.com

<sup>6</sup> Department of Chemistry, Faculty of Science Division II, Tokyo University of Science, Tokyo 162-8601, Japan; akitsu2@rs.tus.ac.jp

\* Correspondence: muhammad\_aurangzeb@hotmail.com (M.A.Z.); taj\_urrehman81@yahoo.co.uk (T.U.R.); xiaoweilie@ynu.edu.cn (W.X.); Tel.: +92-300-596-1093 (M.A.Z)

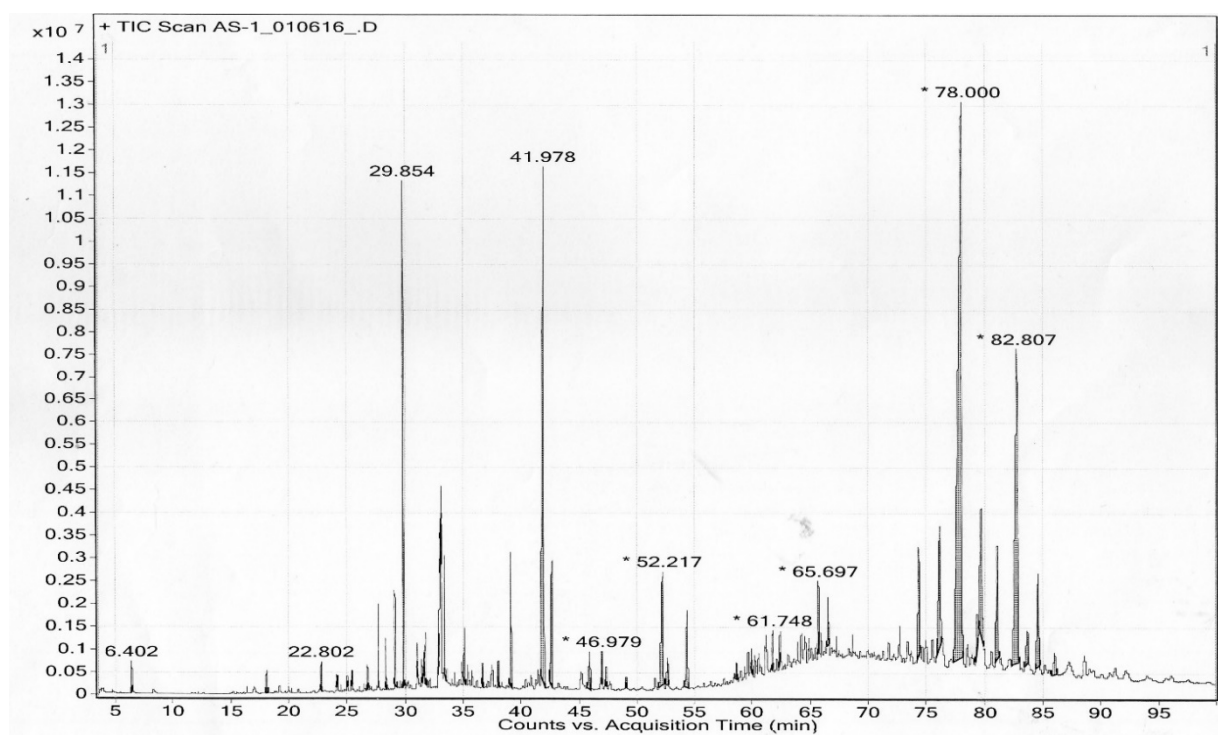

Figure S1. GC-MS chromatogram of IhA.

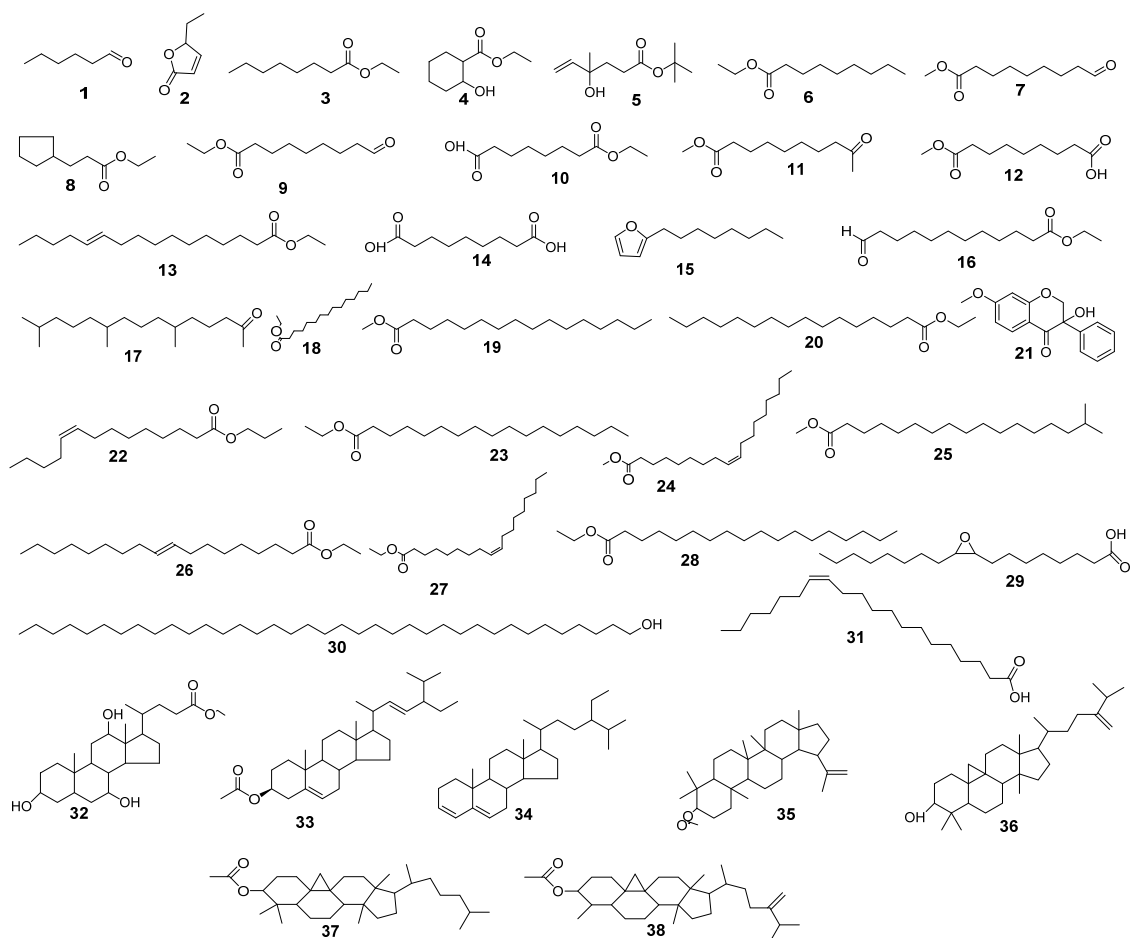

Figure S2. Structure of chemical constituent identified in sample IhA 1-38.

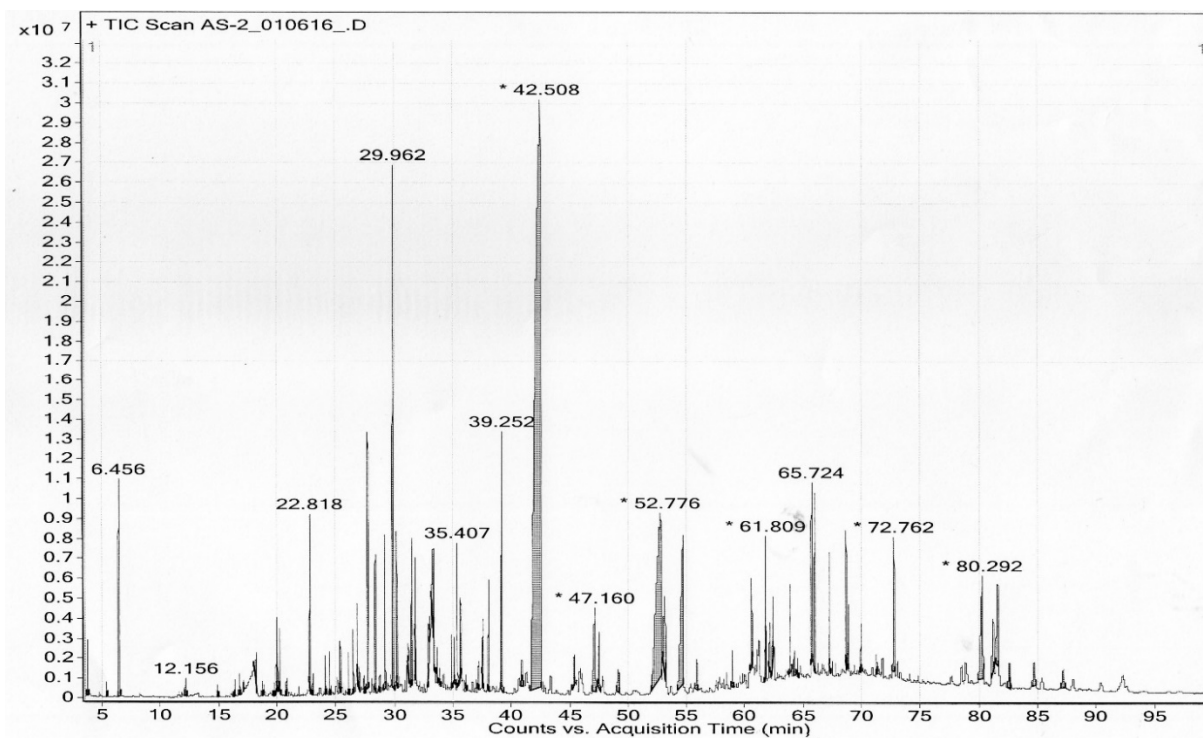

Figure S3. GC-MS chromatogram of IhB.

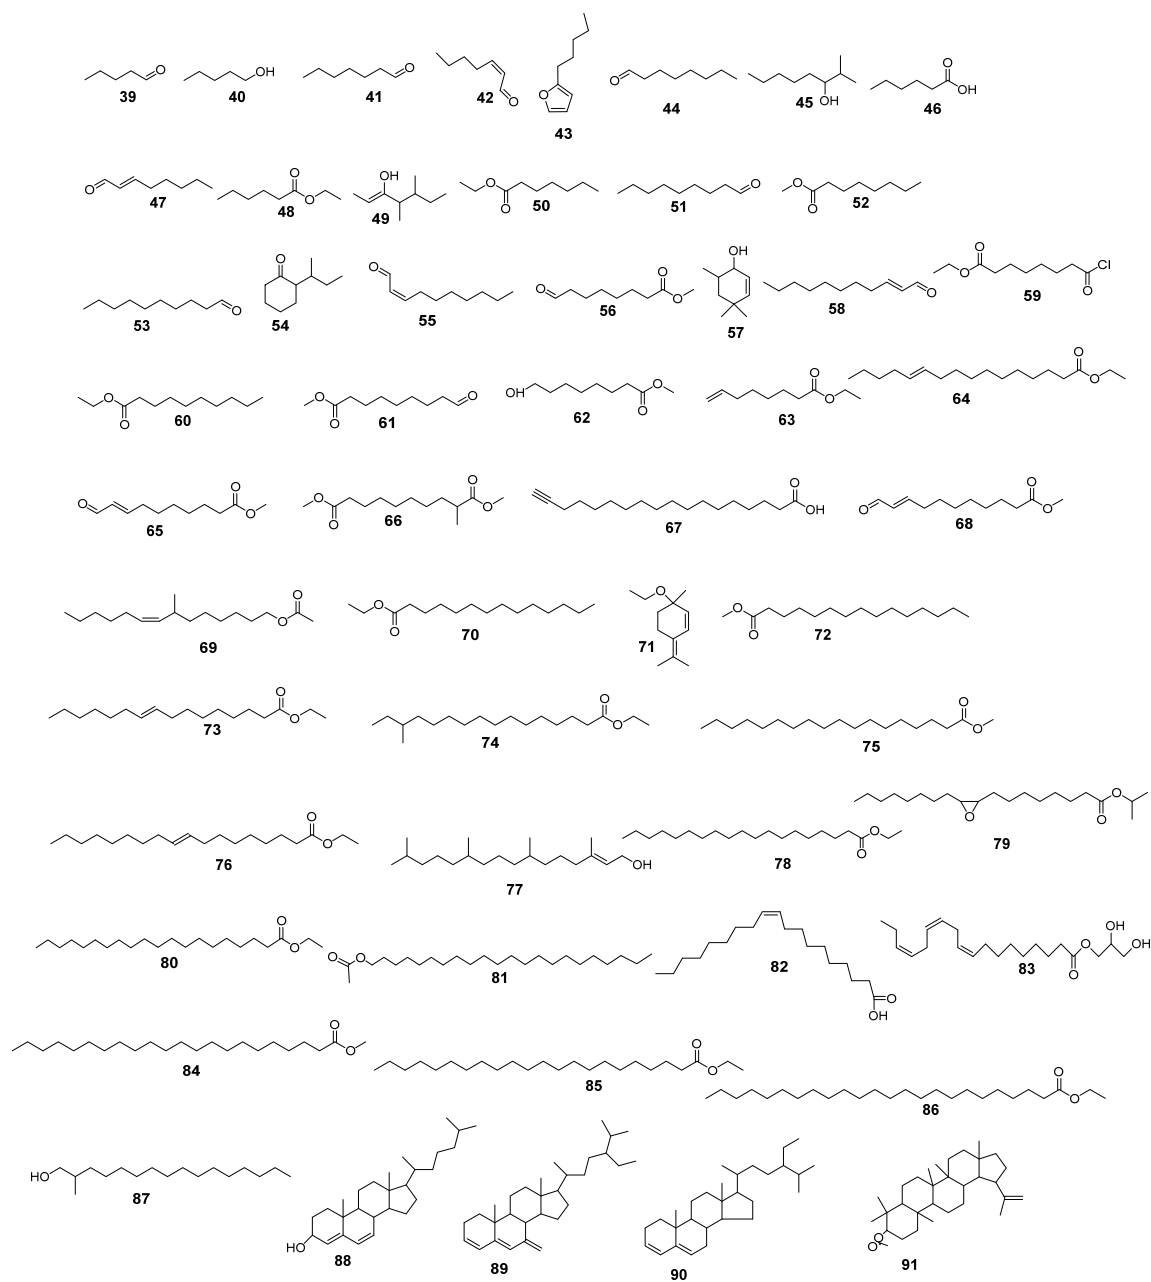

**Figure S4.** Structure of chemical constituent identified in IhB 39-91.

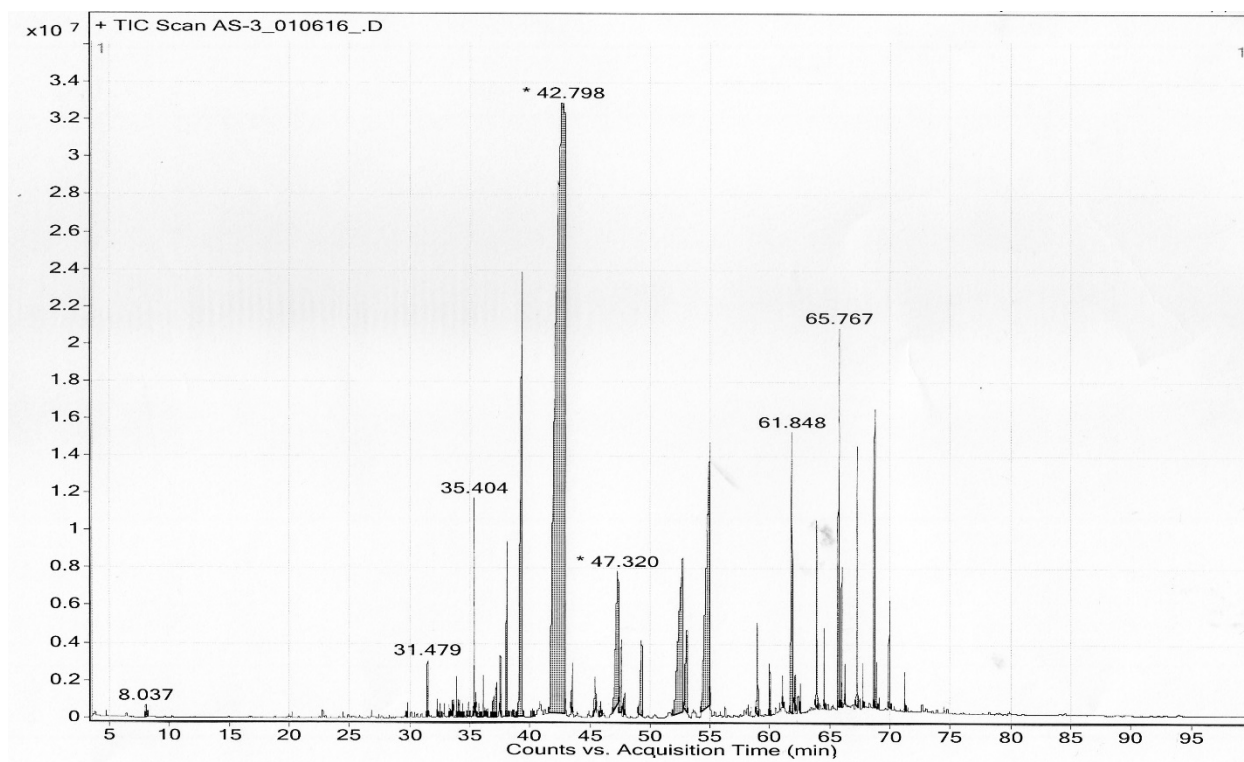

Figure S5. GC-MS chromatogram of IhC.

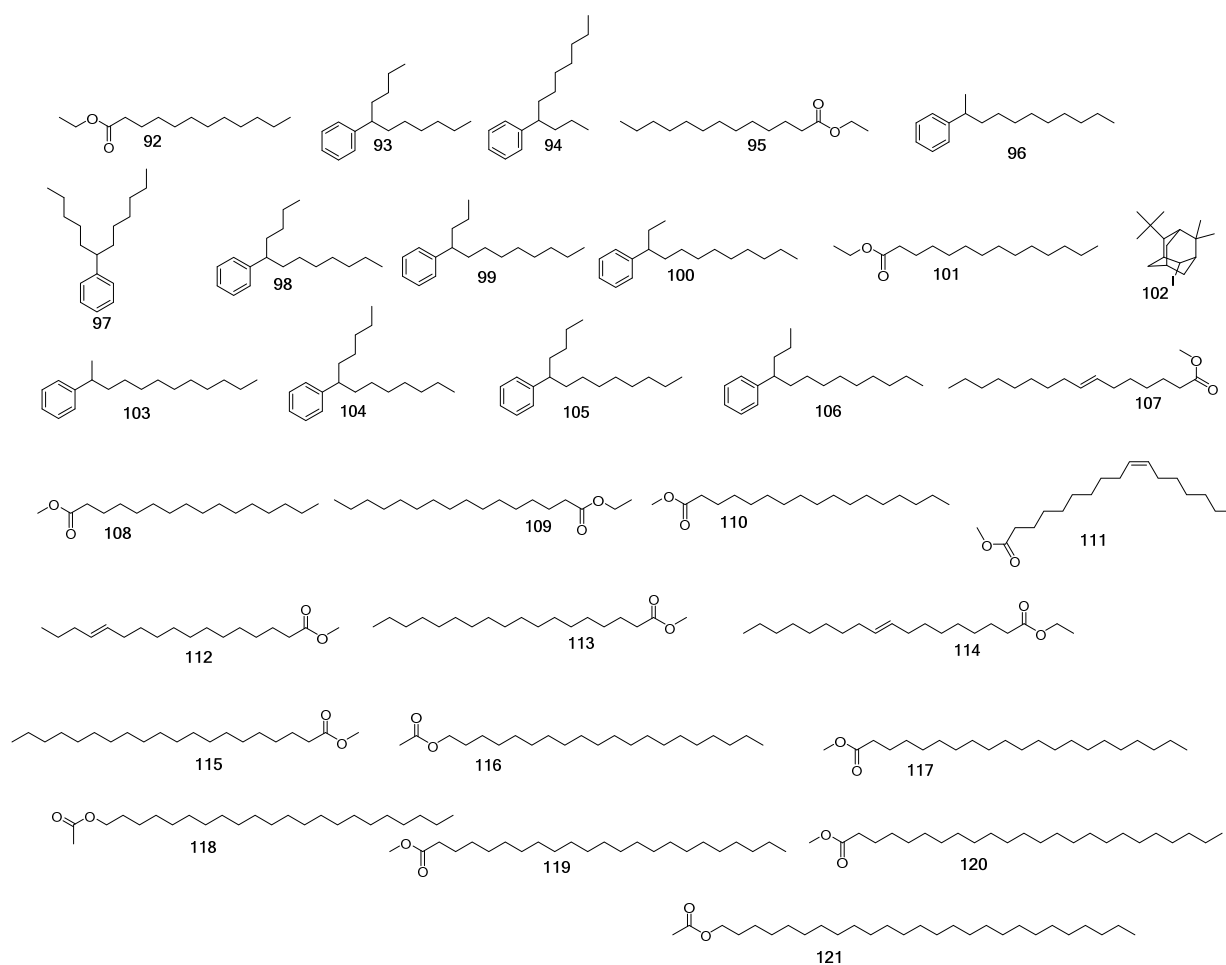

Figure S6. Structure of chemical constituent identified in IhC 92-121.

Table S1. List of identified compounds in IhA.

| S. No | Compound Name                                         | Smile ID                                               | MF                                             | MW     | CAS-NO     | Docking Score against Alpha-Amylase | Docking Score against Alpha-Glucosidase |
|-------|-------------------------------------------------------|--------------------------------------------------------|------------------------------------------------|--------|------------|-------------------------------------|-----------------------------------------|
| 1     | Hexanal                                               | <chem>CCCCC=O</chem>                                   | C <sub>6</sub> H <sub>12</sub> O               | 100.09 | 66-25-1    | -4.31266499                         | -4.99079609                             |
| 2     | 2(5H)-Furanone, 5-ethyl-                              | <chem>O=C1OC(CC)C=C1</chem>                            | C <sub>6</sub> H <sub>8</sub> O <sub>2</sub>   | 112.05 | 2407-43-4  | -4.27905607                         | -4.9228735                              |
| 3     | Octanoic acid, ethyl ester                            | <chem>CCCCCCCC(OCC)=O</chem>                           | C <sub>10</sub> H <sub>20</sub> O <sub>2</sub> | 172.15 | 106-32-1   | -5.485264                           | -6.54436159                             |
| 4     | Cyclohexanecarboxylic acid, 2-hydroxy-, ethyl ester   | <chem>OC1CCCCC1C(OCC)=O</chem>                         | C <sub>9</sub> H <sub>16</sub> O <sub>3</sub>  | 172.11 | NA         | -5.35771751                         | -6.12163973                             |
| 5     | 4-Hydroxy-4-methylhex-5-enoic acid, tert.-butyl ester | <chem>C=CC(O)(C)CCC(OC(C)(C)C)=O</chem>                | C <sub>11</sub> H <sub>20</sub> O <sub>3</sub> | 200.14 | NA         | -5.31870127                         | -6.61857176                             |
| 6     | Nonanoic acid, ethyl ester                            | <chem>CCOC(CCCCCC)=O</chem>                            | C <sub>11</sub> H <sub>22</sub> O <sub>2</sub> | 186.16 | 123-29-5   | -5.48971462                         | -7.03561306                             |
| 7     | Nonanoic acid, 9-oxo-, methyl ester                   | <chem>COC(CCCCCC=O)=O</chem>                           | C <sub>10</sub> H <sub>18</sub> O <sub>3</sub> | 186.13 | 1931-63-1  | -5.34788609                         | -6.91497087                             |
| 8     | 3-Cyclopentylpropionic acid, ethyl ester              | <chem>CCOC(CCC1CCCC1)=O</chem>                         | C <sub>10</sub> H <sub>18</sub> O <sub>2</sub> | 170.13 | 17931-64-5 | -5.14433193                         | -6.46507025                             |
| 9     | Nonanoic acid, 9-oxo-, ethyl ester                    | <chem>CCOC(CCCCCC=O)=O</chem>                          | C <sub>11</sub> H <sub>22</sub> O <sub>3</sub> | 200.14 | 3433-16-7  | -5.47711182                         | -7.22573948                             |
| 10    | Ethyl hydrogen suberate                               | <chem>OC(CCCCCC(OCC)=O)=O</chem>                       | C <sub>10</sub> H <sub>18</sub> O <sub>4</sub> | 202.12 | 14113-01-0 | -5.5131135                          | -6.88290501                             |
| 11    | Decanoic acid, 9-oxo-,methyl ester                    | <chem>COC(CCCCCC(C)=O)=O</chem>                        | C <sub>11</sub> H <sub>20</sub> O <sub>3</sub> | 200.14 | 2575-07-7  | -5.56907511                         | -7.37059641                             |
| 12    | Nonanedioic acid, monomethyl ester                    | <chem>COC(CCCCCC(O)=O)=O</chem>                        | C <sub>10</sub> H <sub>18</sub> O <sub>4</sub> | 202.12 | 2104-19-0  | -5.57761002                         | -7.15866947                             |
| 13    | (E)-11-Hexadecenoic acid, ethyl ester                 | <chem>CCCC/C=C/CCCCCCCCC(OCC)=O</chem>                 | C <sub>18</sub> H <sub>34</sub> O <sub>2</sub> | 282.26 | NA         | -6.53635454                         | -8.24896908                             |
| 14    | Azelaic Acid                                          | <chem>OC(CCCCCC(O)=O)=O</chem>                         | C <sub>9</sub> H <sub>16</sub> O <sub>4</sub>  | 188.10 | 123-99-9   | -5.33855867                         | -6.61465979                             |
| 15    | 2-n-Octylfuran                                        | <chem>CCCCCCCCC1=CC=CO1</chem>                         | C <sub>12</sub> H <sub>20</sub> O              | 180.15 | 4179-38-8  | -5.1912365                          | -6.75099754                             |
| 16    | 12-Oxododecanoic acid, ethyl ester                    | <chem>[H]C(CCCCCCCCCC(OCC)=O)=O</chem>                 | C <sub>14</sub> H <sub>26</sub> O <sub>3</sub> | 242.19 | NA         | -5.92969322                         | -7.79101896                             |
| 17    | 2-Pentadecanone, 6, 10, 14-trimethyl-                 | <chem>CC(C)CCCC(C)CCCC(C)CCCC(C)=O</chem>              | C <sub>18</sub> H <sub>36</sub> O              | 268.29 | 502-69-2   | -6.276546                           | -8.76418304                             |
| 18    | Pentadecanoic acid, ethyl ester                       | <chem>CCOC(CCCCCCCCCC)=O</chem>                        | C <sub>17</sub> H <sub>34</sub> O <sub>2</sub> | 270.45 | 41114-00-5 | -6.46793652                         | -8.13654137                             |
| 19    | Hexadecanoic acid, methyl ester                       | <chem>COC(CCCCCCCCCCCCCC)=O</chem>                     | C <sub>17</sub> H <sub>34</sub> O <sub>2</sub> | 270.26 | 112-39-0   | -6.43439007                         | -7.87997484                             |
| 20    | Hexadecanoic acid, ethyl ester                        | <chem>CCCCCCCCCCCCCCCC(OCC)=O</chem>                   | C <sub>18</sub> H <sub>36</sub> O <sub>2</sub> | 284.27 | 628-97-7   | -6.5955987                          | -8.75007629                             |
| 21    | 3-Hydroxy-7-methoxy-3-phenyl-4-chromanone             | <chem>COC1=CC=C(C(C(C2=CC=CC=C2)(O)CO3)=O)C3=C1</chem> | C <sub>16</sub> H <sub>14</sub> O <sub>4</sub> | 270.09 | NA         | -5.65472698                         | -7.05745459                             |
| 22    | n-Propyl 9-tetradecenoate                             | <chem>CCCC/C=C\CCCCCCCC(OCCC)=O</chem>                 | C <sub>17</sub> H <sub>32</sub> O <sub>2</sub> | 268.24 | NA         | -6.57248163                         | -7.82908297                             |

| S. No | Compound Name                                                               | Smile ID                                                                          | MF                                             | MW     | CAS-NO     | Docking Score against Alpha-Amylase | Docking Score against Alpha-Glucosidase |
|-------|-----------------------------------------------------------------------------|-----------------------------------------------------------------------------------|------------------------------------------------|--------|------------|-------------------------------------|-----------------------------------------|
| 23    | Heptadecanoic acid, ethyl ester                                             | <chem>CCOC(CCCCCCCCCCCCCCCC)=O</chem>                                             | C <sub>19</sub> H <sub>38</sub> O <sub>2</sub> | 298.29 | 14010-23-2 | -6.77076817                         | -9.1118927                              |
| 24    | 9- Octadecenoic acid(Z)-, methyl ester                                      | <chem>COC(CCCCCC/C=C\CCCCCCCC)=O</chem>                                           | C <sub>19</sub> H <sub>36</sub> O <sub>2</sub> | 296.48 | 112-62-9   | -6.59404707                         | -8.75259495                             |
| 25    | Heptadecanoic acid, 16-methyl-, methyl ester                                | <chem>COC(CCCCCCCCCCCCCCCC(C)C)=O</chem>                                          | C <sub>19</sub> H <sub>38</sub> O <sub>2</sub> | 298.28 | 5129-61-3  | -6.80502367                         | -8.50299454                             |
| 26    | (E)-9-Octadecenoic acid ethyl ester                                         | <chem>CCCCCCCC/C=C/CCCCCCCC(OCC)=O</chem>                                         | C <sub>20</sub> H <sub>38</sub> O <sub>2</sub> | 310.29 | 6114-18-7  | -7.15074158                         | -9.11989594                             |
| 27    | Ethyl Oleate                                                                | <chem>CCOC(CCCCCC/C=C\CCCCCCCC)=O</chem>                                          | C <sub>20</sub> H <sub>38</sub> O <sub>2</sub> | 310.51 | 111-62-6   | -7.05047369                         | -8.97215843                             |
| 28    | Octadecanoic acid, ethyl ester                                              | <chem>CCOC(CCCCCCCCCCCCCCCCCC)=O</chem>                                           | C <sub>20</sub> H <sub>40</sub> O <sub>2</sub> | 312.30 | 111-61-5   | -6.95561504                         | -8.56285477                             |
| 29    | Oxiraneoctanoic acid, 3-octyl-, cis-                                        | <chem>CCCCCCCCC(O1)C1CCCCCCCC(O)=O</chem>                                         | C <sub>18</sub> H <sub>34</sub> O <sub>3</sub> | 298.25 | 24560-98-3 | -6.79044151                         | -8.45058346                             |
| 30    | 1-Heptatriacotanol                                                          | <chem>CCCCCCCCCCCCCCCCCCCCCCCCCCCCCCCCCCCCCCCCCO</chem>                           | C <sub>37</sub> H <sub>76</sub> O              | 536.59 | NA         | Not Docked                          | Not Docked                              |
| 31    | cis-13-Eicosenoic acid                                                      | <chem>CCCCC/C=C\CCCCCCCCCCCCC(O)=O</chem>                                         | C <sub>20</sub> H <sub>38</sub> O <sub>2</sub> | 310.29 | 17735-94-3 | -6.93859339                         | -8.71145344                             |
| 32    | Ethyl iso-allocholate                                                       | <chem>CC(CCC(OCC)=O)C1CCC2C3C(O)CC4CC(O)CCC4(C)C3CC(O)C21C</chem>                 | C <sub>26</sub> H <sub>44</sub> O <sub>5</sub> | 436.32 | NA         | -6.57296314                         | -8.12089443                             |
| 33    | Stigmasta-5,22-dien-3-ol, acetate, 3β                                       | <chem>CCC(/C=C/C(C(CCCC1C(CC=C2C[C@H](C3)OC(C)=O)C(CC4)C23C)C14C)C(C)C</chem>     | C <sub>31</sub> H <sub>50</sub> O <sub>2</sub> | 458.41 | 4651-48-3  | -7.06750381                         | -4.1289                                 |
| 34    | Stigmastan-3,5-diene                                                        | <chem>CC12C(C=CCC2)=CCC3C1CCC4(C)C3CC(C4C(CCC(C(C)C)CC)C</chem>                   | C <sub>29</sub> H <sub>48</sub>                | 396.38 | 4970-37-0  | -6.51642656                         | -7.713274                               |
| 35    | Lup-20(29)-en-3-ol, acetate, (3β)-                                          | <chem>O=C(OC1CCC(C(CCC2C3(C)CCC4(C)C2C(C(C)=C)CC4)C3(C)CC5)(C)C5C1(C)C)C</chem>   | C <sub>32</sub> H <sub>52</sub> O <sub>2</sub> | 468.40 | 1617-68-1  | -6.550179                           | -5.50565338                             |
| 36    | 9, 19-Cyclolanostan-3-ol, 24-methylene-, (3β)-                              | <chem>OC1CCC2(C3)C(CCC4C23CCC5(C)C4(C)CCC5C(CCC(C(C)C)=C)C)C1(C)C</chem>          | C <sub>31</sub> H <sub>52</sub> O              | 440.40 | 1449-09-8  | -6.87323761                         | -7.1842041                              |
| 37    | 9, 19-Cyclolanostan-3-ol, acetate, (3β)-                                    | <chem>CC(OC1C(C)(C)C(CCC2C3(C)C(C(C(CCC(C)C)C)CC3)(C)CC4)C5(C24C5)CC1)=O</chem>   | C <sub>32</sub> H <sub>54</sub> O <sub>2</sub> | 470.41 | 4575-74-0  | -7.1042161                          | -7.37506437                             |
| 38    | 9, 19- Cycloergost-24 (28)-en-3-ol, 4, 14-dimethyl-, acetate, (3β, 4α, 5α)- | <chem>CC(OC1C(C)C(CCC2C3(C)C(C(C(CCC(C(C)C)=C)C)CC3)(C)CC4)C5(C24C5)CC1)=O</chem> | C <sub>32</sub> H <sub>52</sub> O <sub>2</sub> | 468.40 | 10376-42-8 | -7.17082357                         | -7.33567381                             |

Table S2. List of identified compounds in IhB.

| S. No | Compound Name                               | Smile ID                               | MF                                               | MW     | CAS-NO     | Docking Score against Alpha-Amylase | Docking Score against Alpha-Glucosidase |
|-------|---------------------------------------------|----------------------------------------|--------------------------------------------------|--------|------------|-------------------------------------|-----------------------------------------|
| 39    | Pentanal                                    | <chem>CCCCC=O</chem>                   | C <sub>5</sub> H <sub>10</sub> O                 | 86.07  | 110-62-3   | -4.32325125                         | -4.93257999                             |
| 40    | 1-Pentanol                                  | <chem>CCCCCO</chem>                    | C <sub>5</sub> H <sub>12</sub> O                 | 88.09  | 71-41-0    | -3.87824464                         | -4.77271938                             |
| 41    | Heptanal                                    | <chem>CCCCCCC=O</chem>                 | C <sub>7</sub> H <sub>14</sub> O                 | 114.10 | 111-71-7   | -4.03811502                         | -5.37939739                             |
| 42    | 2-Heptenal, (Z)-                            | <chem>CCCC/C=C\C=O</chem>              | C <sub>7</sub> H <sub>12</sub> O                 | 112.09 | 57266-86-1 | -4.48092222                         | -5.05973959                             |
| 43    | Furan, 2-pentyl-                            | <chem>CCCCC1=CC=CO1</chem>             | C <sub>9</sub> H <sub>14</sub> O                 | 138.10 | 3777-69-3  | -4.82865477                         | -5.86127758                             |
| 44    | Octanal                                     | <chem>O=CCCCCCCC</chem>                | C <sub>8</sub> H <sub>16</sub> O                 | 128.12 | 124-13-0   | -4.3046174                          | -5.86470699                             |
| 45    | 3-Octanol, 2-methyl-                        | <chem>CCCCC(C(C)C)O</chem>             | C <sub>9</sub> H <sub>20</sub> O                 | 144.15 | 26533-34-6 | -4.78631783                         | -6.10976982                             |
| 46    | Hexanoic acid                               | <chem>CCCCC(O)=O</chem>                | C <sub>6</sub> H <sub>12</sub> O <sub>2</sub>    | 116.08 | 142-62-1   | -4.58951378                         | -5.33519888                             |
| 47    | 2-Octenal, (E)-                             | <chem>O=C/C=C/CCCC</chem>              | C <sub>8</sub> H <sub>14</sub> O                 | 126.10 | 2548-87-0  | -4.2365818                          | -5.40431356                             |
| 48    | Hexanoic acid, ethyl ester                  | <chem>CCCCC(OCC)=O</chem>              | C <sub>8</sub> H <sub>16</sub> O <sub>2</sub>    | 144.12 | 123-66-0   | -4.6092453                          | -6.06598473                             |
| 49    | 2-Hepten-3-ol, 4, 5-dimethyl-               | <chem>C/C=C(C(C)C(C)CC)\O</chem>       | C <sub>9</sub> H <sub>18</sub> O                 | 142.14 | 55956-37-1 | -4.5863843                          | -5.74066496                             |
| 50    | Heptanoic acid, ethyl ester                 | <chem>CCOC(CCCCCC)=O</chem>            | C <sub>9</sub> H <sub>18</sub> O <sub>2</sub>    | 158.13 | 106-30-9   | -5.10614061                         | -5.75709963                             |
| 51    | Nonanal                                     | <chem>CCCCCCCCC=O</chem>               | C <sub>9</sub> H <sub>18</sub> O                 | 142.14 | 124-19-6   | -4.95700645                         | -5.70021248                             |
| 52    | Octanoic acid, methyl ester                 | <chem>COC(CCCCCC)=O</chem>             | C <sub>9</sub> H <sub>18</sub> O <sub>2</sub>    | 158.13 | 111-11-5   | -5.0524044                          | -5.58636475                             |
| 53    | Decanal                                     | <chem>CCCCCCCCC=O</chem>               | C <sub>10</sub> H <sub>20</sub> O                | 156.15 | 112-31-2   | -5.05645657                         | -6.73987961                             |
| 54    | 2-Sec-Butylcyclohexanone                    | <chem>O=C1C(C(C)CC)CCCC1</chem>        | C <sub>10</sub> H <sub>18</sub> O                | 154.14 | 14765-30-1 | -5.03070116                         | -5.70856428                             |
| 55    | 2-Decenal, (Z)-                             | <chem>O=C/C=C\CCCCC</chem>             | C <sub>10</sub> H <sub>18</sub> O                | 154.14 | 2497-25-8  | -4.95901442                         | -6.27999401                             |
| 56    | Methyl 8-oxooctanoate                       | <chem>O=CCCCCCCC(OC)=O</chem>          | C <sub>9</sub> H <sub>16</sub> O <sub>3</sub>    | 172.11 | 4316-48-7  | -5.12607718                         | -6.21193838                             |
| 57    | 4, 4, 6-Trimethyl-cyclohex-2-en-1-ol        | <chem>CC1(C)CC(C)C(O)C=C1</chem>       | C <sub>9</sub> H <sub>16</sub> O                 | 140.12 | NA         | -4.52863503                         | -5.51741457                             |
| 58    | 2-Undecenal                                 | <chem>CCCCCCCC/C=C/C=O</chem>          | C <sub>11</sub> H <sub>20</sub> O                | 168.15 | 2463-77-6  | -4.93627262                         | -6.62668419                             |
| 59    | Octanoic acid, 8-chloro-8-oxo-, ethyl ester | <chem>CCOC(CCCCCC(Cl)=O)=O</chem>      | C <sub>10</sub> H <sub>17</sub> ClO <sub>3</sub> | 220.09 | 14113-02-1 | -5.67675924                         | -6.43358374                             |
| 60    | Decanoic acid, ethyl ester                  | <chem>CCOC(CCCCCCCC)=O</chem>          | C <sub>12</sub> H <sub>24</sub> O <sub>2</sub>   | 200.18 | 110-38-3   | -5.60674953                         | -7.02947712                             |
| 61    | Nonanoic acid, 9-oxo-, methyl ester         | <chem>COC(CCCCCCCC=O)=O</chem>         | C <sub>10</sub> H <sub>18</sub> O <sub>3</sub>   | 186.13 | 1931-63-1  | -5.29726171                         | -6.27741861                             |
| 62    | Methyl 8-hydroxyoctanoate                   | <chem>OCCCCCCCC(OC)=O</chem>           | C <sub>9</sub> H <sub>18</sub> O <sub>3</sub>    | 174.12 | NA         | -5.04441357                         | -6.31654358                             |
| 63    | 7-Octenoic acid, ethyl ester                | <chem>C=CCCCCCC(OCC)=O</chem>          | C <sub>10</sub> H <sub>18</sub> O <sub>2</sub>   | 170.13 | 35194-38-8 | -5.21281576                         | -5.88366032                             |
| 64    | E-11-Hexadecenoic acid, ethyl ester         | <chem>CCCC/C=C/CCCCCCCCC(OCC)=O</chem> | C <sub>18</sub> H <sub>34</sub> O <sub>2</sub>   | 282.26 | NA         | -6.50866795                         | -8.24960423                             |
| 65    | Methyl 10-oxo-8-decenoate                   | <chem>O=C/C=C/CCCCCCC(OC)=O</chem>     | C <sub>11</sub> H <sub>18</sub> O <sub>3</sub>   | 198.13 | 65114-83-2 | -5.52289963                         | -6.80319262                             |

| S. No | Compound Name                                                            | Smile ID                                             | MF                                             | MW     | CAS-NO      | Docking Score against Alpha-Amylase | Docking Score against Alpha-Glucosidase |
|-------|--------------------------------------------------------------------------|------------------------------------------------------|------------------------------------------------|--------|-------------|-------------------------------------|-----------------------------------------|
| 66    | Dimethyl 2-methyldecane-1, 10-dioate                                     | <chem>COC(CCCCCCCC(C)C(OC)=O)=O</chem>               | C <sub>13</sub> H <sub>24</sub> O <sub>4</sub> | 244.17 | NA          | −6.10659981                         | −7.56790543                             |
| 67    | 17-Octadecynoic acid                                                     | <chem>OC(CCCCCCCCCCCCCCCC#C)=O</chem>                | C <sub>18</sub> H <sub>32</sub> O <sub>2</sub> | 280.24 | 34450-18-5  | −6.43764019                         | −8.18279076                             |
| 68    | Methyl 11-oxo-9-undecenoate                                              | <chem>O=C/C=C/CCCCCCCC(OC)=O</chem>                  | C <sub>12</sub> H <sub>20</sub> O <sub>3</sub> | 212.14 | 53613-55-1  | −5.65583229                         | −6.90458632                             |
| 69    | 7- Methyl - Z- tetradecen- 1- ol- acetate                                | <chem>CCCCC/C=C\C(C)CCCCCOC(C)=O</chem>              | C <sub>17</sub> H <sub>32</sub> O <sub>2</sub> | 268.24 | NA          | −6.44342041                         | −8.32530499                             |
| 70    | Tetradecanoic acid, ethyl ester                                          | <chem>CCOC(CCCCCCCCCCCCCC)=O</chem>                  | C <sub>16</sub> H <sub>32</sub> O <sub>2</sub> | 256.24 | 24-06-1     | −6.22171164                         | −7.88299227                             |
| 71    | 6-Octadiene, 3-ethoxy-3, 7-dimethyl-                                     | <chem>C/C(C)=C1CCC(C)(OCC)C=C/1</chem>               | C <sub>12</sub> H <sub>20</sub> O              | 180.15 | NA          | −5.12247133                         | −6.11779451                             |
| 72    | Pentadecanoic acid, methyl ester                                         | <chem>COC(CCCCCCCCCCCCCC)=O</chem>                   | C <sub>16</sub> H <sub>32</sub> O <sub>2</sub> | 256.24 | 7132-64-1   | −6.18482256                         | −8.04787731                             |
| 73    | Ethyl 9-hexadecenoate                                                    | <chem>CCCCC/C=C/CCCCCCCC(OCC)=O</chem>               | C <sub>18</sub> H <sub>34</sub> O <sub>2</sub> | 282.26 | 54546-22-4  | −6.36167288                         | −8.08851337                             |
| 74    | Ethyl 14-methyl-hexadecanoate                                            | <chem>CCC(C)CCCCCCCCCCCCC(OCC)=O</chem>              | C <sub>19</sub> H <sub>38</sub> O <sub>2</sub> | 298.29 | NA          | −6.75107527                         | −8.20447445                             |
| 75    | Octadecenoic acid, methyl ester                                          | <chem>COC(CCCCCCCCCCCCCCCC)=O</chem>                 | C <sub>19</sub> H <sub>38</sub> O <sub>2</sub> | 298.29 | NA          | −6.98113012                         | −8.40727997                             |
| 76    | (E) -9- Octadecenoic acid ethyl ester                                    | <chem>CCCCCCCC/C=C/CCCCCCCC(OCC)=O</chem>            | C <sub>20</sub> H <sub>38</sub> O <sub>2</sub> | 310.29 | 6114-18-7   | −6.87963486                         | −8.37716389                             |
| 77    | 3, 7, 11, 15- Tetramethyl -2- hexadecen-1 -ol                            | <chem>CC(C)CCCC(C)CCCC(C)CCC/C(C)=C/CO</chem>        | C <sub>20</sub> H <sub>40</sub> O              | 296.31 | 102608-53-7 | −7.20854521                         | −8.05761528                             |
| 78    | Nonadecanoic acid, ethyl ester                                           | <chem>CCCCCCCCCCCCCCCCCCCC(OCC)=O</chem>             | C <sub>21</sub> H <sub>42</sub> O <sub>2</sub> | 326.32 | 18281-04-4  | −7.19974422                         | −9.01764488                             |
| 79    | Octadecanoic acid, 9, 10-epoxy-, isopropyl ester                         | <chem>CCCCCCCCC1C(O1)CCCCCCCC(OC(C)C)=O</chem>       | C <sub>21</sub> H <sub>40</sub> O <sub>3</sub> | 340.30 | NA          | −6.90465403                         | −9.27101898                             |
| 80    | Eicosanoic acid, ethyl ester                                             | <chem>CCCCCCCCCCCCCCCCCCCC(OCC)=O</chem>             | C <sub>22</sub> H <sub>44</sub> O <sub>2</sub> | 340.33 | 18281-05-5  | −7.15885353                         | −8.50954723                             |
| 81    | 1-Docosanol, acetate                                                     | <chem>O=C(C)OCCCCCCCCCCCCCCCCCCCCC</chem>            | C <sub>24</sub> H <sub>48</sub> O <sub>2</sub> | 368.37 | 822-26-4    | −7.39843893                         | −9.11747551                             |
| 82    | cis-10-Nonadecenoic acid                                                 | <chem>CCCCCCCC/C=C\CCCCCCCC(O)=O</chem>              | C <sub>19</sub> H <sub>36</sub> O <sub>2</sub> | 296.27 | 73033-09-7  | −6.76501608                         | −8.4207592                              |
| 83    | 9, 12, 15- Octadecatrienoic acid, 2, 3-dihydroxypropyl ester, (Z, Z, Z)- | <chem>CC/C=C\C/C=C\C/C=C\CCCCCCCC(OC(CO)CO)=O</chem> | C <sub>21</sub> H <sub>36</sub> O <sub>4</sub> | 352.26 | NA          | −6.97605228                         | −9.59869957                             |
| 84    | Docosanoic acid, methyl ester                                            | <chem>CCCCCCCCCCCCCCCCCCCC(OC)=O</chem>              | C <sub>23</sub> H <sub>46</sub> O <sub>2</sub> | 354.35 | 929-77-1    | −7.36427069                         | −8.77867508                             |
| 85    | Docosanoic acid, ethyl ester                                             | <chem>CCCCCCCCCCCCCCCCCCCC(OCC)=O</chem>             | C <sub>24</sub> H <sub>48</sub> O <sub>2</sub> | 368.37 | 5908-87-2   | −7.12757349                         | −9.34544277                             |
| 86    | Ethyl tetracosanoate                                                     | <chem>O=C(OCC)CCCCCCCCCCCCCCCCCCCCCCC</chem>         | C <sub>26</sub> H <sub>52</sub> O <sub>2</sub> | 396.40 | 24634-95-5  | −8.25968075                         | −9.31482697                             |
| 87    | 1-Hexadecanol, 2-methyl-                                                 | <chem>CCCCCCCCCCCCCCCC(C)CO</chem>                   | C <sub>17</sub> H <sub>36</sub> O              | 256.28 | 2490-48-4   | −6.16457653                         | −8.13131428                             |



| S. No | Compound Name                                   | Smile ID                                                                       | MF                                             | MW     | CAS-NO     | Docking Score against Alpha-Amylase | Docking Score against Alpha-Glucosidase |
|-------|-------------------------------------------------|--------------------------------------------------------------------------------|------------------------------------------------|--------|------------|-------------------------------------|-----------------------------------------|
| 88    | Cholesta-4,6-dien-3-ol, (3 $\beta$ )-           | <chem>OC1CCC2(C)C(C=CC3C2CCC4(C)C3CCC4C(CCCC(C)C)C)=C1</chem>                  | C <sub>27</sub> H <sub>44</sub> O              | 384.34 | 14214-69-8 | -6.55595922                         | -6.86098099                             |
| 89    | Stigmasta-3,5-dien-7-one                        | <chem>CC12C(C=CCC1)=CC(C3C2CCC4(C)C3CC4C(CCC(C)C(C)C)C)=C</chem>               | C <sub>29</sub> H <sub>46</sub> O              | 410.35 | NA         | -6.19042683                         | -7.28196764                             |
| 90    | Stigmastan-3,5-dien                             | <chem>CC12C(C=CCC2)=CCC3C1CCC4(C)C3CC4C(C)CCC(C(C)C)CC</chem>                  | C <sub>29</sub> H <sub>48</sub>                | 396.38 | NA         | -6.40985394                         | -7.53033066                             |
| 91    | Lup- 20 (29)- en-3 -ol, acetate, (3 $\beta$ ) - | <chem>O=C(OC1CCC(C(CCC2C3(C)CCC4(C)C2C(C(C)=C)CC4)C3(C)CC5(C)C5C1(C)C)C</chem> | C <sub>32</sub> H <sub>52</sub> O <sub>2</sub> | 468.40 | 1617-68-1  | -6.93653917                         | -5.68568516                             |

Table S3. List of identified compounds in lhC.

| S. No | Compound Name                           | Smile ID                                                                    | MF                                             | MW     | CAS-NO     | Docking Score against Alpha-Amylase | Docking Score against Alpha-glucosidase |
|-------|-----------------------------------------|-----------------------------------------------------------------------------|------------------------------------------------|--------|------------|-------------------------------------|-----------------------------------------|
| 92    | Dodecanoic acid, ethyl ester            | <chem>CCOC(CCCCCCCCCCCC)=O</chem>                                           | C <sub>14</sub> H <sub>28</sub> O <sub>2</sub> | 228.21 | 106-33-2   | -5.71854591                         | -7.29325151                             |
| 93    | Benzene, (1-butylheptyl)-               | <chem>CCCC(C1=CC=CC=C1)CCCCC</chem>                                         | C <sub>17</sub> H <sub>28</sub>                | 232.22 | 4537-15-9  | -5.47292233                         | -7.02896166                             |
| 94    | Benzene, (1-propyloctyl)-               | <chem>CCCC(C1=CC=CC=C1)CCCCC</chem>                                         | C <sub>17</sub> H <sub>28</sub>                | 232.22 | 4536-86-1  | -5.93453646                         | -7.02986383                             |
| 95    | Ethyl tridecanoate                      | <chem>CCCCCCCCCCCC(OC)=O</chem>                                             | C <sub>15</sub> H <sub>30</sub> O <sub>2</sub> | 242.22 | 28267-29-0 | -6.41103649                         | -8.04990196                             |
| 96    | Benzene, (1-methyldecyl)-               | <chem>CCCCCCCC(C)C1=CC=CC=C1</chem>                                         | C <sub>17</sub> H <sub>28</sub>                | 232.22 | 4536-88-3  | -5.64050913                         | -7.06706905                             |
| 97    | Benzene, (1-pentylheptyl)-              | <chem>CCCCC(CCCCC)C1=CC=CC=C1</chem>                                        | C <sub>18</sub> H <sub>30</sub>                | 246.23 | 2719-62-2  | -5.75403023                         | -6.58053255                             |
| 98    | Benzene, (1-butylloctyl)-               | <chem>CCCC(CCCCCC)C1=CC=CC=C1</chem>                                        | C <sub>18</sub> H <sub>30</sub>                | 246.23 | 2719-63-3  | -6.01381588                         | -7.09059381                             |
| 99    | Benzene, (1-propylnonyl)-               | <chem>CCCC(CCCCCC)C1=CC=CC=C1</chem>                                        | C <sub>18</sub> H <sub>30</sub>                | 246.23 | 2719-64-4  | -5.88937235                         | -7.27823877                             |
| 100   | Benzene, (1-ethyldecyl)-                | <chem>CCC(CCCCCCCC)C1=CC=CC=C1</chem>                                       | C <sub>18</sub> H <sub>30</sub>                | 246.23 | 2400-00-2  | -5.80677986                         | -7.47779083                             |
| 101   | Tetra decanoic acid, ethyl ester        | <chem>CCOC(CCCCCCCCCCCC)=O</chem>                                           | C <sub>16</sub> H <sub>32</sub> O <sub>2</sub> | 256.24 | 124-06-1   | -6.42799234                         | -8.04944801                             |
| 102   | 9-t-Butyl-4-iodo-2,2-dimethyladamantane | <chem>I[C@@H]1[C@H](C2)C(C)(C)[C@H]3[C@H](C(C)(C)C)[C@@H]1C[C@@H]2C3</chem> | C <sub>16</sub> H <sub>27</sub> I              | 346.12 | NA         | -5.0323143                          | -6.39810419                             |
| 103   | Benzene, (1-methylundecyl)-             | <chem>CC(C1=CC=CC=C1)CCCCCCCCC</chem>                                       | C <sub>18</sub> H <sub>30</sub>                | 246.23 | 2719-61-1  | -6.17118549                         | -7.12832546                             |
| 104   | Benzene, (1-pentylloctyl)-              | <chem>CCCCCCCC(CCCCC)C1=CC=CC=C1</chem>                                     | C <sub>19</sub> H <sub>32</sub>                | 260.25 | 4534-49-0  | -5.96058226                         | -7.64328575                             |
| 105   | Benzene, (1-butylnonyl)-                | <chem>CCCC(CCCCCC)C1=CC=CC=C1</chem>                                        | C <sub>19</sub> H <sub>32</sub>                | 260.25 | 4534-50-3  | -5.8515029                          | -7.66689396                             |
| 106   | Benzene, (1-propyldecyl)-               | <chem>CCCC(CCCCCCCC)C1=CC=CC=C1</chem>                                      | C <sub>19</sub> H <sub>32</sub>                | 260.25 | 4534-51-4  | -6.13278246                         | -7.51954603                             |
| 107   | 7-Hexadecenoic acid, methyl ester, (Z)- | <chem>CCCCCCCC/C=C/CCCCC(OC)=O</chem>                                       | C <sub>17</sub> H <sub>32</sub> O <sub>2</sub> | 268.24 | 56875-67-3 | -6.34425068                         | -7.73232126                             |

| S. No | Compound Name                            | Smile ID                                    | MF                                             | MW     | CAS-NO    | Docking Score against Alpha-Amylase | Docking Score against Alpha-glucosidase |
|-------|------------------------------------------|---------------------------------------------|------------------------------------------------|--------|-----------|-------------------------------------|-----------------------------------------|
| 108   | Hexadecenoic acid, methyl ester          | <chem>COC(CCCCCCCCCCCCCCCC)=O</chem>        | C <sub>17</sub> H <sub>34</sub> O <sub>2</sub> | 270.26 | NA        | −6.58620548                         | −8.07269287                             |
| 109   | Hexadecenoic acid, ethyl ester           | <chem>CCCCCCCCCCCCCCCCC(OCC)=O</chem>       | C <sub>18</sub> H <sub>36</sub> O <sub>2</sub> | 284.27 | NA        | −6.41025019                         | −8.1135788                              |
| 110   | Heptadecanoic acid, methyl ester         | <chem>COC(CCCCCCCCCCCCCCCC)=O</chem>        | C <sub>18</sub> H <sub>36</sub> O <sub>2</sub> | 284.27 | 1731-92-6 | −6.44106197                         | −8.43236828                             |
| 111   | cis-10-Heptadecenoic acid, methyl ester  | <chem>CCCCC/C=C\CCCCCCCCC(OC)=O</chem>      | C <sub>18</sub> H <sub>34</sub> O <sub>2</sub> | 282.26 | NA        | −6.84707069                         | −8.07504368                             |
| 112   | trans-13-Octadecenoic acid, methyl ester | <chem>CCC/C=C/CCCCCCCCCCCCC(OC)=O</chem>    | C <sub>19</sub> H <sub>36</sub> O <sub>2</sub> | 296.27 | NA        | −6.73890829                         | −8.29063797                             |
| 113   | Octadecanoic acid, methyl ester          | <chem>CCCCCCCCCCCCCCCCC(OC)=O</chem>        | C <sub>19</sub> H <sub>38</sub> O <sub>2</sub> | 298.50 | 112-61-8  | −6.91980696                         | −8.48671246                             |
| 114   | (E)-9-Octadecenoic acid, ethyl ester     | <chem>CCCCCCC/C=C/CCCCCCC(OCC)=O</chem>     | C <sub>20</sub> H <sub>38</sub> O <sub>2</sub> | 310.29 | 6114-18-7 | −7.27659082                         | −8.62704754                             |
| 115   | Eicosanoic acid, methyl ester            | <chem>COC(CCCCCCCCCCCCCCCCCCCC)=O</chem>    | C <sub>21</sub> H <sub>42</sub> O <sub>2</sub> | 326.32 | 1120-28-1 | −7.16555834                         | −8.67712688                             |
| 116   | Eicosyl acetate                          | <chem>CC(OCCCCCCCCCCCCCCCCCCC)=O</chem>     | C <sub>22</sub> H <sub>44</sub> O <sub>2</sub> | 340.33 | 822-24-2  | −6.92805481                         | −8.52007294                             |
| 117   | Heneicosanoic acid, methyl ester         | <chem>COC(CCCCCCCCCCCCCCCCCCCC)=O</chem>    | C <sub>22</sub> H <sub>44</sub> O <sub>2</sub> | 340.33 | 6064-90-0 | −7.13835382                         | −8.73273849                             |
| 118   | Docosanoic acid, acetate                 | <chem>O=C(C)OCCCCCCCCCCCCCCCCCCCCC</chem>   | C <sub>24</sub> H <sub>48</sub> O <sub>2</sub> | 368.37 | NA        | −7.71306992                         | −8.78453636                             |
| 119   | Tricosanoic acid, methyl ester           | <chem>CCCCCCCCCCCCCCCCCCCCC(OC)=O</chem>    | C <sub>24</sub> H <sub>48</sub> O <sub>2</sub> | 368.37 | 2433-97-8 | −7.57870722                         | −9.3228426                              |
| 120   | Tetracosanoic acid, methyl ester         | <chem>COC(CCCCCCCCCCCCCCCCCCCC)=O</chem>    | C <sub>25</sub> H <sub>50</sub> O <sub>2</sub> | 382.38 | NA        | −7.7322011                          | −8.98537827                             |
| 121   | Hexacosyl acetate                        | <chem>CC(OCCCCCCCCCCCCCCCCCCCCCCC)=O</chem> | C <sub>28</sub> H <sub>56</sub> O <sub>2</sub> | 424.43 | 822-32-2  | −8.2944994                          | −9.73762512                             |
